# Supplementary material for: Randomized Controlled Trial Comparing Health Coach-Delivered Smartphone-Guided Self-Help With Standard Care for Adults With Binge Eating
Source: Atypon-hosted journal article supplement (doi:10.1176/appi.ajp.2019.19020184), 2020-02-01
Supplement: appi.ajp.2019.19020184.ds001.pdf [file appi.ajp.2019.19020184.ds001.pdf]

Table S1.

Raw Mean and Standard Deviation Estimates of Objective Binge Days

|                        | Baseline |      | 4-Week |      | 8-Week |      | 12 Week |      | 26-Week |      | 52-Week |      |
|------------------------|----------|------|--------|------|--------|------|---------|------|---------|------|---------|------|
|                        | Mean     | SD   | Mean   | SD   | Mean   | SD   | Mean    | SD   | Mean    | SD   | Mean    | SD   |
| Standard Care          | 10.5     | 6.64 | 7.09   | 5.88 | 6.55   | 6.56 | 6.39    | 6.85 | 4.38    | 6.06 | 4.41    | 5.87 |
| CBT-GSH + Noom Monitor | 8.69     | 5.85 | 6.52   | 5.60 | 3.85   | 4.84 | 2.40    | 3.64 | 2.24    | 4.36 | 1.88    | 3.63 |

Note. CBT-GSH = cognitive behavioral therapy guided self-help. SD = standard deviation.

Table S2.

Latent Variable Loadings for Composite Moderator (M\*) Analyses

| Moderator            | $\beta$ (loading) | Standard Error |
|----------------------|-------------------|----------------|
| Education            | .829              | .163           |
| Body Mass Index      | -.299             | .327           |
| Sex                  | .022              | .033           |
| Race (White)         | -.041             | .030           |
| Ethnicity (Hispanic) | -.011             | .021           |
| Marital Status       | -.188             | .042           |
